Anesthesiology  
71:997-999, 1989

## Failure of a Nitrous Oxide-Oxygen Proportioning Device

*To the Editor:*—Without vigilance, asphyxia may occur during the use of an anesthesia machine designed to prevent the delivery of a hypoxic gas mixture. The following occurred during use of an Ohmeda Modulus II Plus anesthesia machine.

While increasing the flow of nitrous oxide ( $N_2O$ ) (to speed the delivery of an increased inspired concentration of volatile agent) the expected subsequent rise of the oxygen ( $O_2$ ) flowmeter bobbin did not occur. Turning the  $O_2$  flow control knob promptly increased the  $O_2$  flow. Caution was advised in the use of the flowmeters when the anesthetist returned from break.

After completing the case, we found that the anesthesia machine's flowmeters could be set to deliver virtually 100%  $N_2O$ . The machine was removed from service until it was repaired by the manufacturer's service representative.

The Ohmeda Modulus II Plus, used extensively at Presbyterian-University Hospital, has a touch-coded  $O_2$  flow control knob, delivers a mandatory minimum  $O_2$  flow of approximately 200 ml/min, incorporates an  $O_2$  analyzer with an audible alarm, and has an  $N_2O$ - $O_2$  proportioning device that delivers a nominal  $FI_{O_2}$  of 25%.<sup>1</sup>

Part of this  $N_2O$ - $O_2$  proportioning device consists of a 14-tooth sprocket (fig. 1, #11) affixed to the  $N_2O$  flow control knob stud (fig. 1, #4) that is linked by a chain to a 29-tooth sprocket (fig. 1, #5) that spins freely on the threaded stud of the  $O_2$  flow control knob.<sup>2</sup> The  $O_2$  flow control knob is secured to its stud by two recessed screws (fig. 2, #1). Adjustment of the  $N_2O$  or  $O_2$  flow control knobs, such that the concentration of  $O_2$  in the total flow decreases to 25%, causes a pin on the "freewheeling" 29-tooth sprocket (fig. 2, #5) to engage a pin on the  $O_2$  flow control knob (fig. 2, #3).<sup>3</sup> The flow control knob spindles then turns in tandem to preserve a nominal  $O_2$  concentration of 25%. The engagement of the pins is both audible (a metallic click) and palpable (a sudden increase in resistance to turning the flow control knob). These signs of pin engagement were absent as I watched the flowmeter bobbins while adjusting the  $N_2O$  flow.

The preoperative check recommended by Ohmeda detects this malfunction.<sup>1</sup> Its cause was quickly found and remedied by the Ohmeda service representative. The pins on the "freewheeling" sprocket and the  $O_2$  control knob failed to engage because of malposition of the knob on its stud. Repositioning the knob closer to the sprocket, which

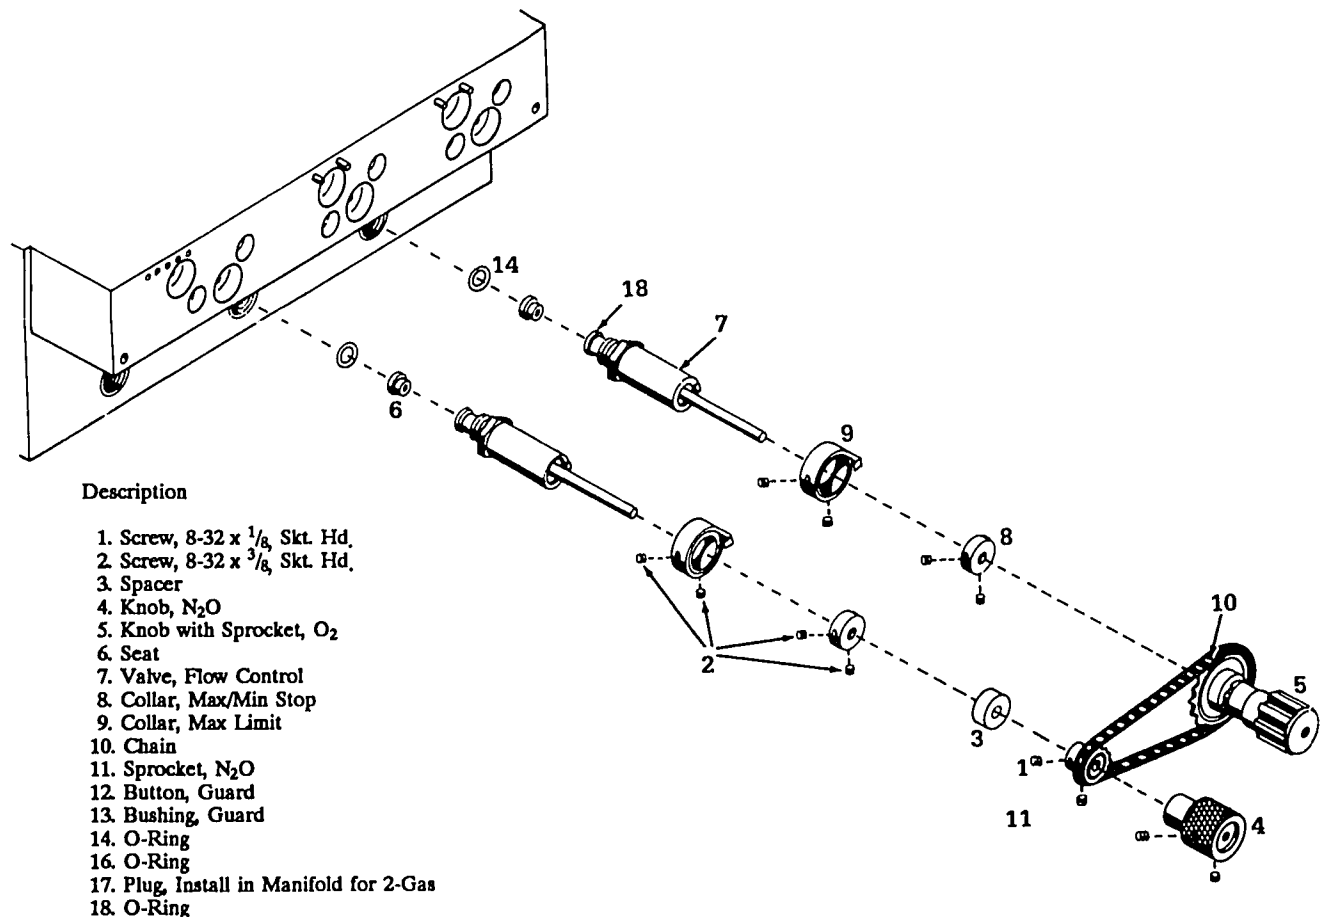

FIG. 1. Exploded diagram of the  $N_2O$ - $O_2$  proportioning device. Illustration courtesy of Ohmeda.<sup>3</sup>

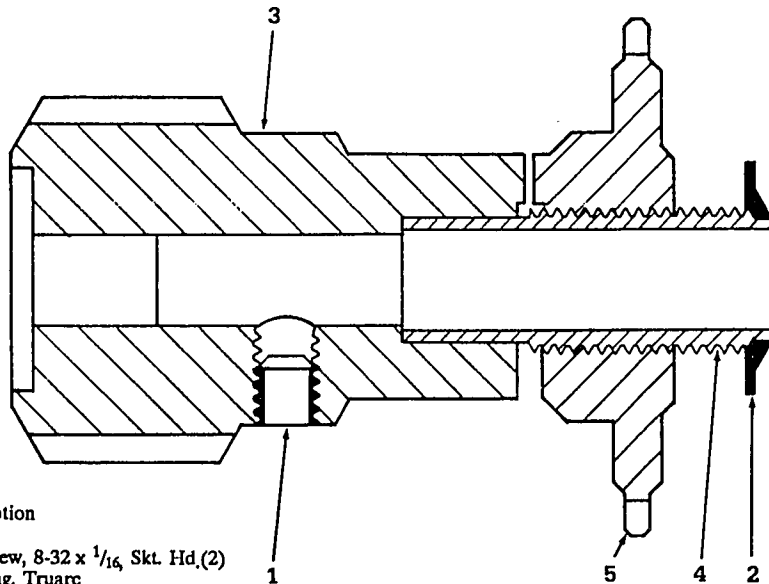

FIG. 2. Cross-sectional diagram of the relationship of the O<sub>2</sub> flow control knob (#3), its stud (#4), and the "freewheeling" sprocket (#5). The pins are in near-approximation at the top of the diagram. Illustration courtesy of Ohmeda.<sup>3</sup>

#### Description

1. Screw, 8-32 x 1/16, Skt. Hd.(2)
2. Ring, Truarc
3. Knob O<sub>2</sub>
4. Stud, 3/8-32 x 1"
5. Sprocket

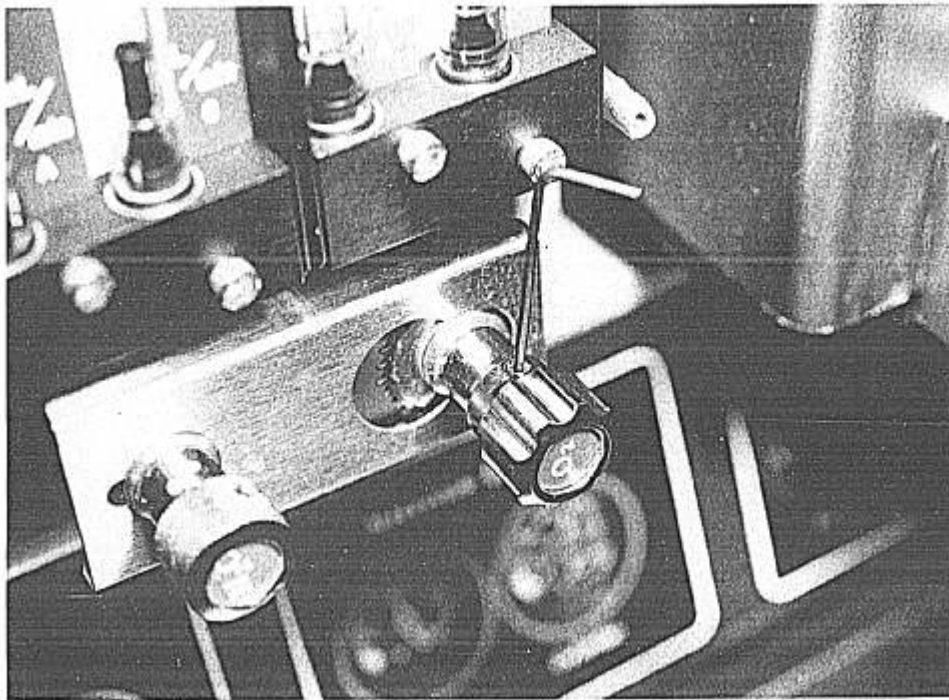

FIG. 3. Adjustment of the malpositioned O<sub>2</sub> flow control knob.

involved loosening and retightening each screw (fig. 3), restored the normal function of the proportioning system.

As a result of this episode, we now require the daily completion and posting of a preoperative checklist on each anesthesia machine. It serves two purposes. It encourages the uniform performance of a standardized inspection and communicates the condition of the anesthesia machine to the next person using the machine.

CHARLES RICHARDS, M.D.  
Assistant Professor of Anesthesiology

University of Pittsburgh School of Medicine  
Room 2405  
Presbyterian-University Hospital  
DeSoto at O'Hara Streets  
Pittsburgh, Pennsylvania 15213

*The author wishes to thank Mr. Chalmers Goodyear, Product Safety Manager of Ohmeda, for providing the technical information necessary for this communication.*

REFERENCES

1. Ohmeda Modulus II Plus Anesthesia System Operation and Service Manual. BOC Health Care, Madison, WI, 1986, sec. 3, p 4
2. Eisenkraft JB: The anesthesia delivery system. Dannemiller Me-

morial Educational Foundation 36th Annual Anesthesiology Review Course Notes, June 1989, p. 107

3. Modulus II Anesthesia Gas Machine Parts Manual. Ohmeda, Madison, WI, December 1984, fig. 12, p 12 and fig. 13, p 13

(Accepted for publication August 29, 1989.)

Anesthesiology  
71:999, 1989

## One More Use of a Vinyl Glove: Ready-Made Protection for the Reusable Pulse Oximeter Monitoring Probe

*To the Editor:*—Technical difficulties in obtaining reliable oxygen saturation ( $Sp_{O_2}$ ) readings with the pulse oximeter are frequently encountered. These occur in patients in whom peripheral vasoconstriction is present or in patients with anatomic abnormalities (ear lobe) or severe injuries to the extremities.

In such circumstances, a clip-on probe can be positioned on the nasal septum, the lips, or the tongue<sup>1</sup> but there is unavoidable contact with the mucous membranes.

In these cases the question of hygiene and contamination arises together with the problem of disinfection if a reusable probe is being used.

Recently, Acherman<sup>2</sup> studied the effect of a vinyl glove interposed between the pulse oximeter probe and the finger and found no significant difference between the  $Sp_{O_2}$  readings of the gloved or ungloved finger.

To protect the oxygen saturation monitor probe from the mucous membranes, we use a 2–3 cm long piece from the finger of a vinyl glove, which easily fits over the probe (fig. 1).

Using the covered ear probe of the Ohmeda oximeter (Ohmeda, Boulder, CO) on the lips (fig. 2),  $Sp_{O_2}$  readings, even in patients with severe vasoconstriction correlated closely with arterial blood saturation measurements.

With this inexpensive, readily available protection, the maintenance of the probe is easier, the contamination less likely, and the lifetime of the probe can be prolonged.

G. I. BARDOCZKY, M.D.  
*Instructor in Anesthesiology*

E. ENGELMAN, M.D.  
*Assistant Professor of Anesthesiology*

A. A. D'HOLLANDER, M.D., Ph.D.  
*Professor and Chairman  
Department of Anesthesiology  
Erasmus Hospital  
Free University of Brussels  
808 Route De Lennik  
1070 Bruxelles  
Belgium*

REFERENCES

1. Hickerson W, Morrell M, Cicala R: Glossal pulse oximetry. *Anesth Analg* 69:73–74, 1989
2. Ackerman WE, Juneja MM, Baumann RC, Kaczorowski DM: The use of a vinyl glove does not effect pulse oximeter monitoring. *ANESTHESIOLOGY* 70:558–559, 1989

(Accepted for publication September 6, 1989.)

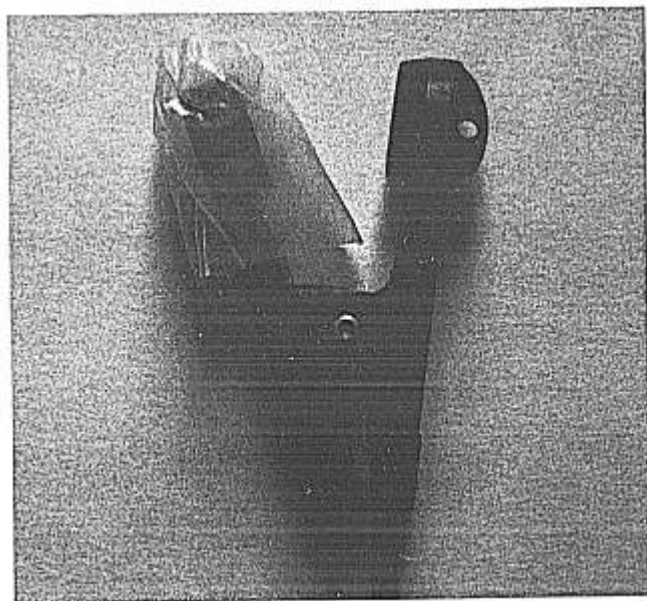

FIG. 1. Clip-on probe of oximeter with protective sheath.

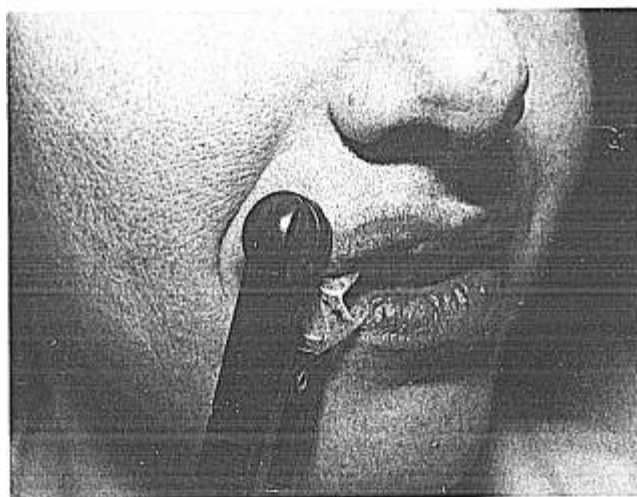

FIG. 2. Covered probe with protective sheath placed on the upper lip.
